# Supplementary material
Source: ML conference proceedings conference paper supplement (https://openreview.net/forum?id=cd2MWwIIHu)
Supplement: supplementary_material [file Appendix.pdf › MANGO/Appendix.pdf]

---

# MANGO: Multimodal Attention-based Normalizing Flow Approach to Fusion Learning

---

Anonymous Author(s)

Affiliation

Address

email

## 1 A Additional Ablation Studies

2 **Effectiveness of Number of Cross-Attention Blocks.** We conducted an ablation study with 16  
3 cross-attention blocks. As shown in Table 1, although using more cross-attention blocks will increase  
4 the computation, it helps to enhance the model performance.

Table 1: Effectiveness of Number of Cross-Attention Blocks.

| # Blocks | NYUv2 |       |      | SUN RGBD |       |      |
|----------|-------|-------|------|----------|-------|------|
|          | Acc.  | mAcc. | mIoU | Acc.     | mAcc. | mIoU |
| 6        | 77.5  | 65.8  | 52.3 | 79.6     | 60.5  | 48.1 |
| 8        | 78.1  | 65.3  | 54.1 | 84.4     | 60.0  | 51.4 |
| 12       | 81.5  | 71.6  | 59.2 | 83.9     | 67.2  | 54.1 |
| 16       | 83.1  | 75.1  | 61.7 | 85.4     | 68.7  | 55.6 |

5 **Computational Cost.** As shown in Table 2, the parameters, GFLOPs, and inference time of our  
6 method are competitive with prior methods. Meanwhile, we achieved state-of-the-art performance on  
7 two segmentation benchmarks.

Table 2: The Comparison of Computational Cost.

| Method           | NYUd2<br>mIoU | SUN RGB-D<br>mIoU | PARAMS | GFLOPS | Inference Time |
|------------------|---------------|-------------------|--------|--------|----------------|
| TokenFusion [2]  | 54.2          | 53.0              | 45.9M  | 108    | 126 ms         |
| GeminiFusion [1] | 57.7          | 53.3              | 75.8M  | 174    | 153 ms         |
| MANGO            | 59.2          | 54.1              | 72.9M  | 152    | 144 ms         |

8 **Attention Visualization.** As shown in Figure 1, our Invertible Cross-Attention layer can capture the  
9 attention interaction from the region in the depth image (red box) to the RGB image. This result  
10 has illustrated the effectiveness of our proposed attention layer in capturing the correlation across  
11 modalities.

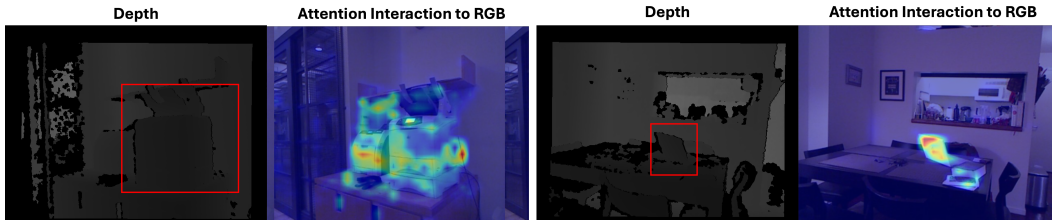

Figure 1: The Attention Visualization of ICA Layer.

## 12 **B Dicussion of Limitations**

13 Our experiments have chosen a set of learning hyper-parameters and benchmarks to support our  
14 hypothesis. However, our work could contain several limitations. Our work studied the effectiveness  
15 of our proposed invertible cross-attention layers in multimodal learning. Thus, the investigation of  
16 balance weights among learning objectives has not been fully exploited, and we leave this experiment  
17 as our future work. Due to computation limitations, our experiments are limited to the standard  
18 scale of the benchmarks. However, we hypothesize that the proposed approaches can generalize  
19 to larger-scale data and benchmark settings according to the fundamental theories presented in our  
20 paper.

## 21 **References**

- 22 [1] D. Jia, J. Guo, K. Han, H. Wu, C. Zhang, C. Xu, and X. Chen. Geminifusion: Efficient pixel-wise  
23 multimodal fusion for vision transformer. *arXiv preprint arXiv:2406.01210*, 2024.
- 24 [2] Y. Wang, X. Chen, L. Cao, W. Huang, F. Sun, and Y. Wang. Multimodal token fusion for vision  
25 transformers. In *Proceedings of the IEEE/CVF conference on computer vision and pattern*  
26 *recognition*, pages 12186–12195, 2022.
